# Supplementary material
Source: PubMed Central journal article supplement (PMC6289616)
Supplement: NIHMS983887-supplement-Supp_info.pdf [file NIHMS983887-supplement-Supp_info.pdf]

## Supporting Figures

anatomical

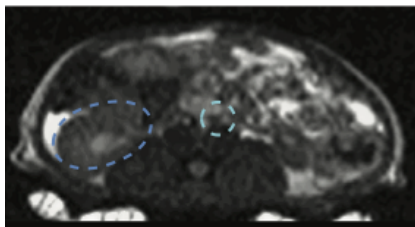

○ vessel  
○ left kidney  
(ROI for tracking and B<sub>1</sub> calibration)

bolus tracking

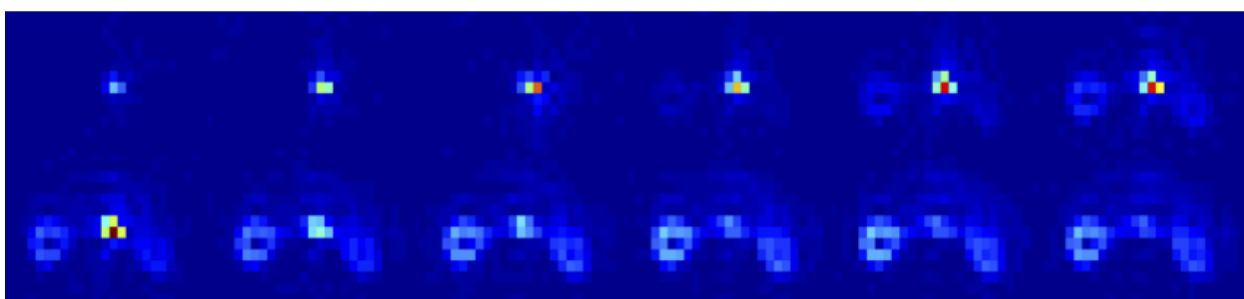

pyruvate images of pyruvate/lactate dynamic imaging

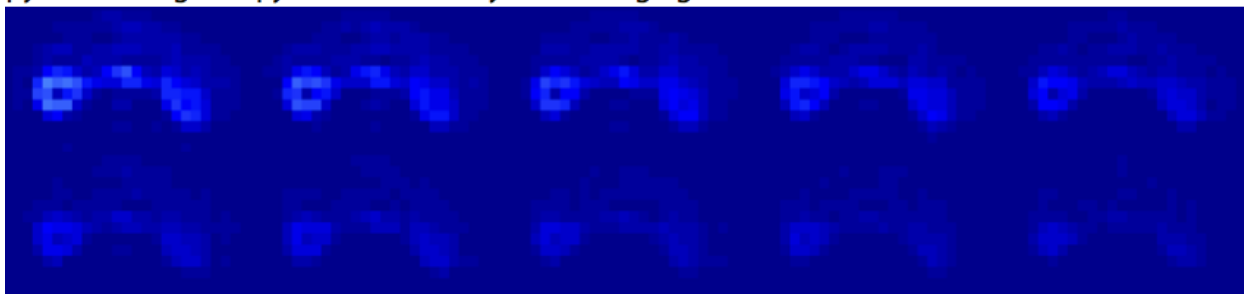

lactate images of pyruvate/lactate dynamic imaging

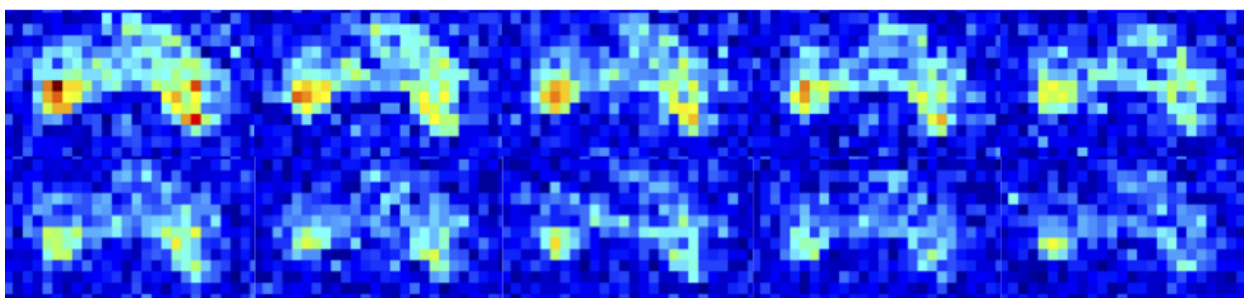

Supporting Figure S1: Results of bolus tracking and pyruvate/lactate dynamic imaging of the experiment described in Fig. 4. Fig. 4 shows every other <sup>13</sup>C image in this figure.

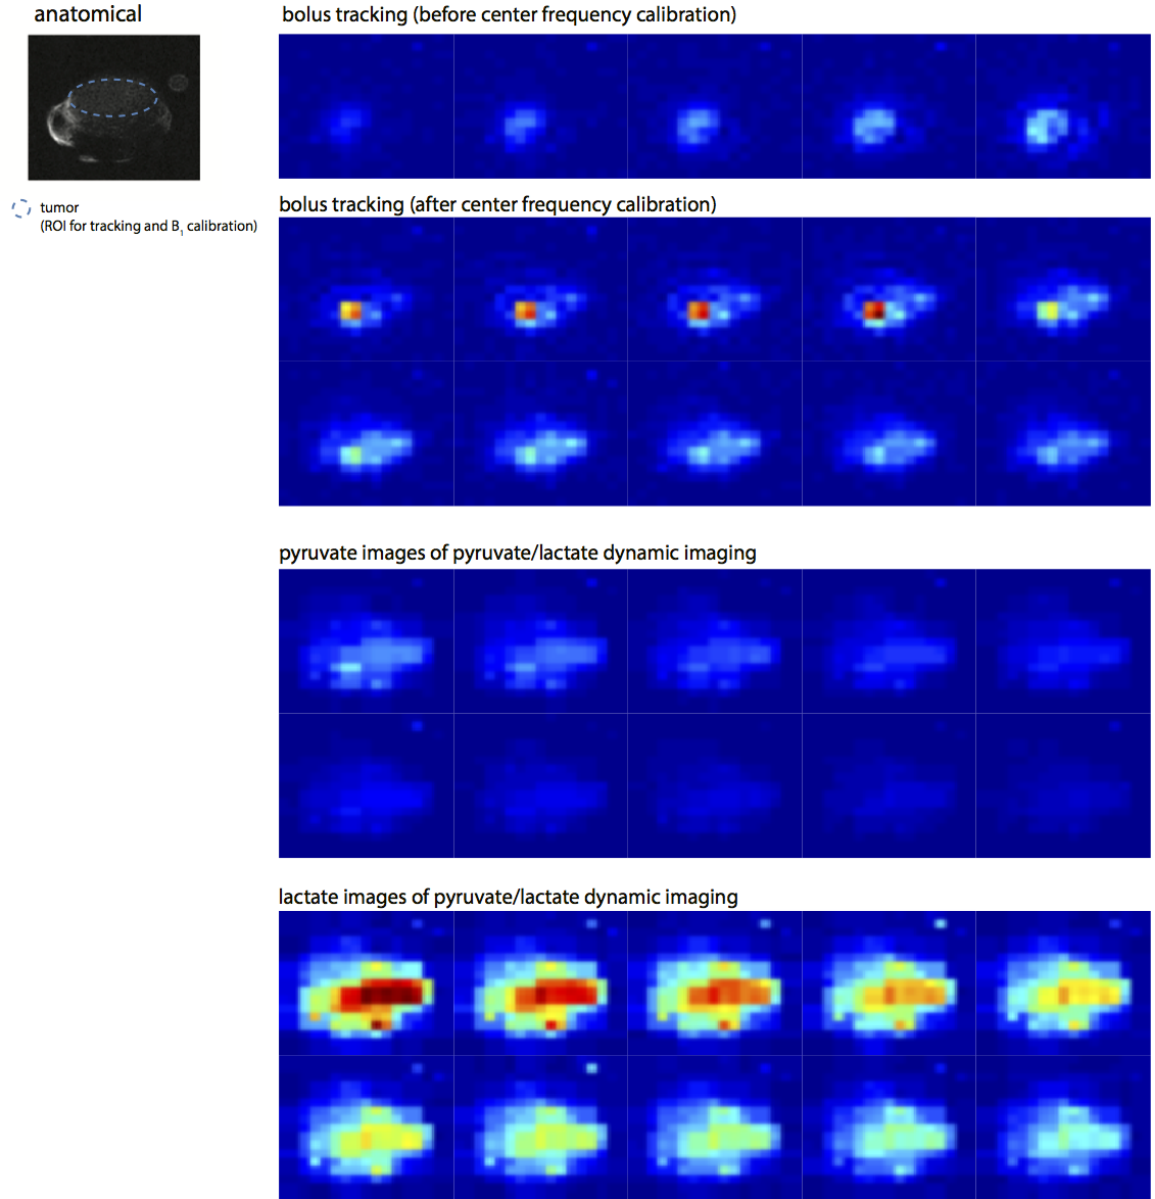

Supporting Figure S2: Results of bolus tracking and pyruvate/lactate dynamic imaging of the experiment described in Fig. 5. Fig. 5 shows every other  $^{13}\text{C}$  image in this figure.

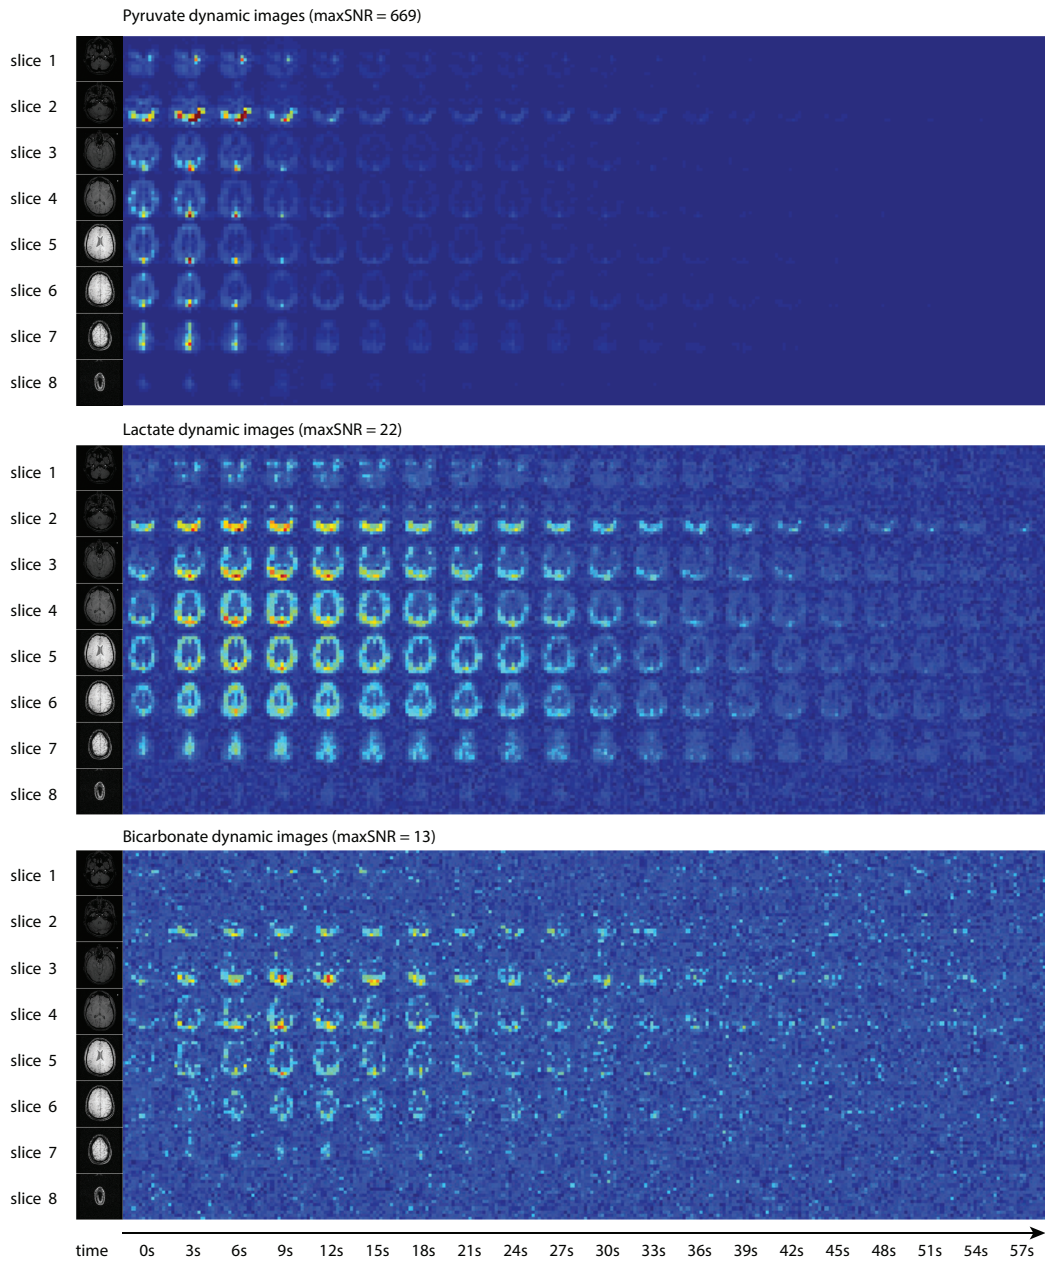

Supporting Figure S3: The first twenty time points of multi-slice dynamic images for the hyperpolarized  $[1-^{13}\text{C}]$ pyruvate human study as described in Fig. 7.
